# Supplementary material
Source: MDPI journal article supplement (https://www.mdpi.com/2304-6740/10/12/264)
Supplement: s1 [file s1]

## Supplementary Data

# Hydrothermal synthesized CoS<sub>2</sub> as efficient co-catalyst to improve the interfacial charge transfer efficiency in BiVO<sub>4</sub>

*Yangqin Gao <sup>\*a</sup>, Guoqing Yang <sup>a</sup>, Zhijie Tian <sup>a</sup>, Hongying Zhu <sup>a</sup>, Lianzheng Ma <sup>a</sup>, Xuli Li <sup>a</sup>, Ning Li <sup>a</sup>, Lei Ge <sup>\*a</sup>*

<sup>a</sup> Department of Materials Science and Engineering, College of New Energy and Materials, China University of Petroleum Beijing, No. 18 Fuxue Rd., Beijing 102249, People's Republic of China.

\* Corresponding author. Tel.: +86 010 8973 3200. E-mail addresses: easheart@126.com (Y.Q Gao), gelei08@sina.com (L. Ge).

### Contents:

Page S-2: **Figure S1.** XRD pattern of the bare BiVO<sub>4</sub> and the standard diffraction of BiVO<sub>4</sub> (JCPDS card No. 14-0688).

Page S-3: **Figure S2.** The XPS survey spectra of the bare BiVO<sub>4</sub> and BiVO<sub>4</sub>/CoS<sub>2</sub> sample.

Page S-4: **Figure S3.** The high-resolution spectra of V 2p of the bare BiVO<sub>4</sub> and BiVO<sub>4</sub>/CoS<sub>2</sub> sample.

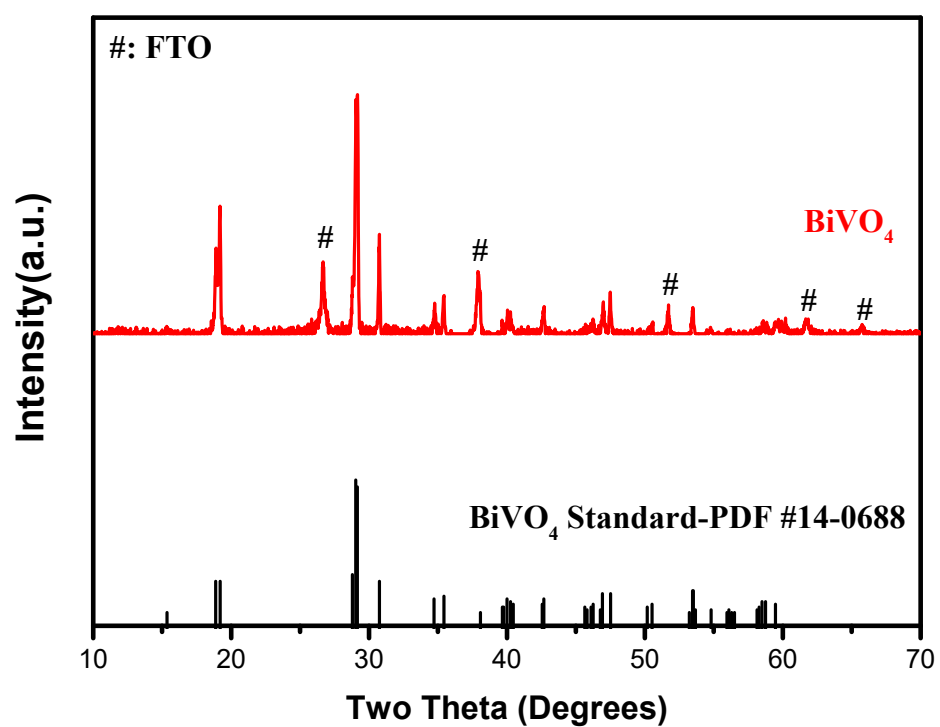

**Figure S1.** XRD pattern of the bare BiVO<sub>4</sub> and the standard diffraction of BiVO<sub>4</sub> (JCPDS card No. 14-0688).

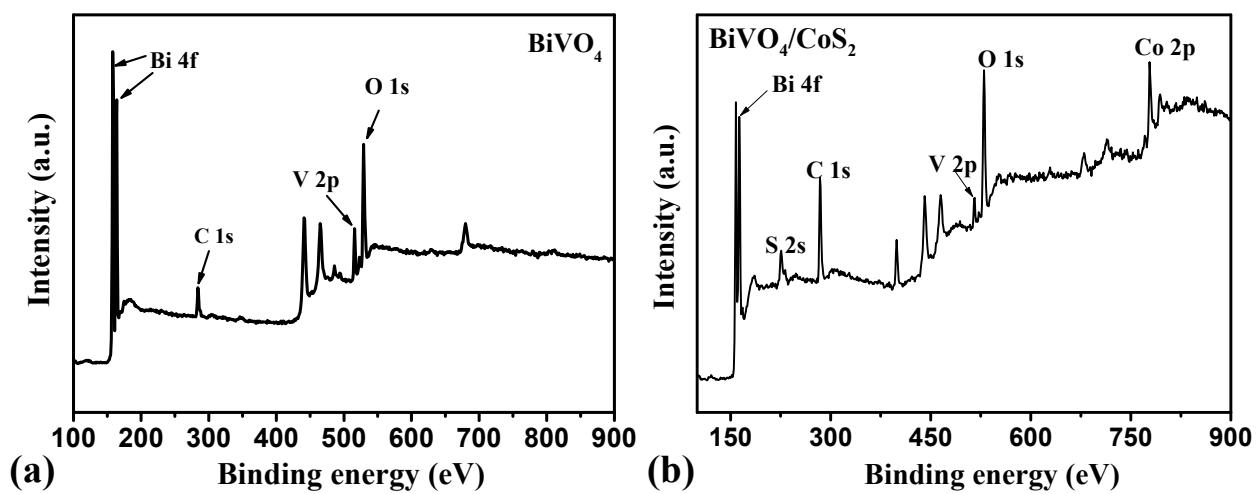

**Figure S2.** The XPS survey spectra of the bare  $\text{BiVO}_4$  and  $\text{BiVO}_4/\text{CoS}_2$  sample.

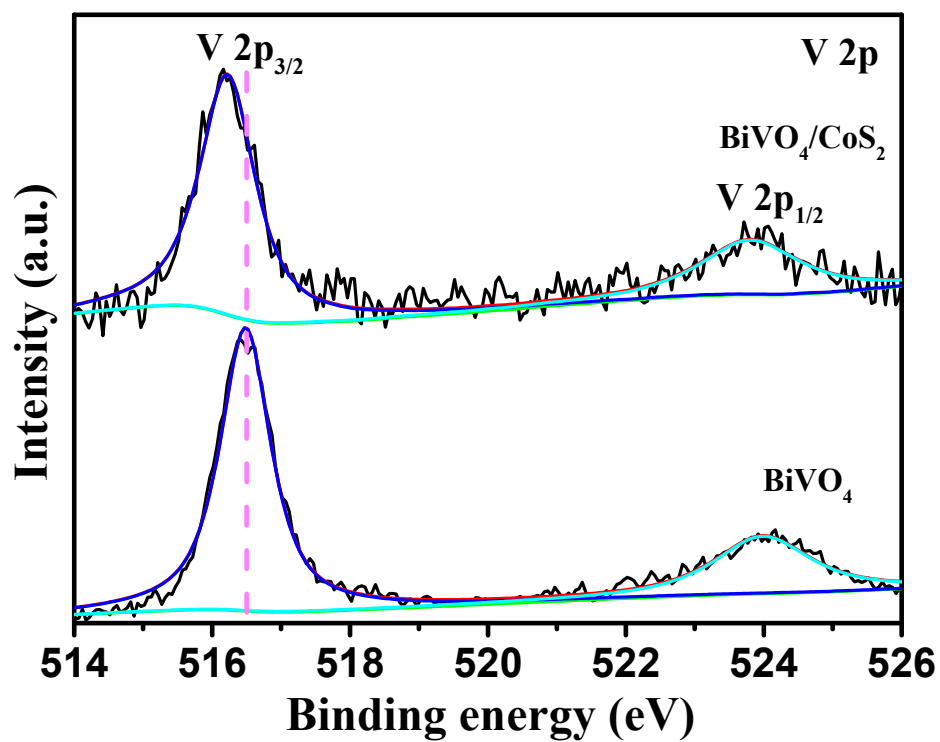

**Figure S3.** The high-resolution spectra of V 2p of the bare  $\text{BiVO}_4$  and  $\text{BiVO}_4/\text{CoS}_2$  sample.
